# Supplementary material for: Synthesis of randomly aminated polyvinylpyrrolidone and its use in the preparation of hydrolyzable conjugates
Source: Royal Society of Chemistry journal article supplement (doi:10.1039/c4ra05354k), 2014-01-01
Supplement: c4ra05354k1.pdf [file c4ra05354k1.pdf]

SUPPORTING INFORMATION

**Synthesis of randomly aminated polyvinylpyrrolidone and its use in  
the preparation of hydrolyzable conjugates**

Anselmo del Prado,\* Rodrigo Navarro, Alberto Gallardo, Carlos Elvira, Helmut  
Reinecke

Instituto de Ciencia y Tecnología de Polímeros, ICTP-CSIC. Juan de la Cierva 3, 28006  
Madrid, Spain.

\* Corresponding author information

Email address: [andollan@ictp.csic.es](mailto:andollan@ictp.csic.es)

Telephone: +34 915622900

Fax: +34 915644853

## Monomers characterization

### 3-(3-bromopropyl)-1-vinyl-2-pyrrolidone (VPBr).

$^1\text{H}$  NMR ( $\text{CDCl}_3$ , 500 MHz):  $\delta$ = 7.08 (dd, 1H, N-CH=CH<sub>2</sub>, J= 15.0 and 10.0 Hz), 4.44 (d, 1H, cis N-CH=CHH, J= 10.0 Hz), 4.40 (d, 1H, trans N-CH=CHH, J= 15.0 Hz), 3.51 (td, 1H, CO-N-CHH, J= 5.0 Hz), 3.47-3.36 (m, 3H, CO-N-CHH and CH<sub>2</sub>-Br), 2.56-2.50 (m, 1H, CO-CH-CH<sub>2</sub>), 2.34-2.27 (m, 1H, CO-CH-CHH), 2.05-1.91 (m, 3H, CO-CH-CHH and CH<sub>2</sub>-CH<sub>2</sub>-CH<sub>2</sub>), 1.79-1.71 (m, 1H, N-CH<sub>2</sub>-CHH), 1.63-1.54 (m, 1H, N-CH<sub>2</sub>-CHH).

$^{13}\text{C}$  NMR ( $\text{CDCl}_3$ , 125 MHz):  $\delta$ = 174.42, 129.38, 94.36, 42.75, 41.56, 33.26, 30.32, 29.87, 24.44.

FTIR ( $\text{cm}^{-1}$ ): 2944, 2881, 1699, 1633, 1426, 1388, 1328, 1268, 981, 851.

MS (ESI): calculated  $m/z$  232.033 and 234.031 ( $\text{M}+1$ )<sup>+</sup>, found  $m/z$  232.032 and 234.030.

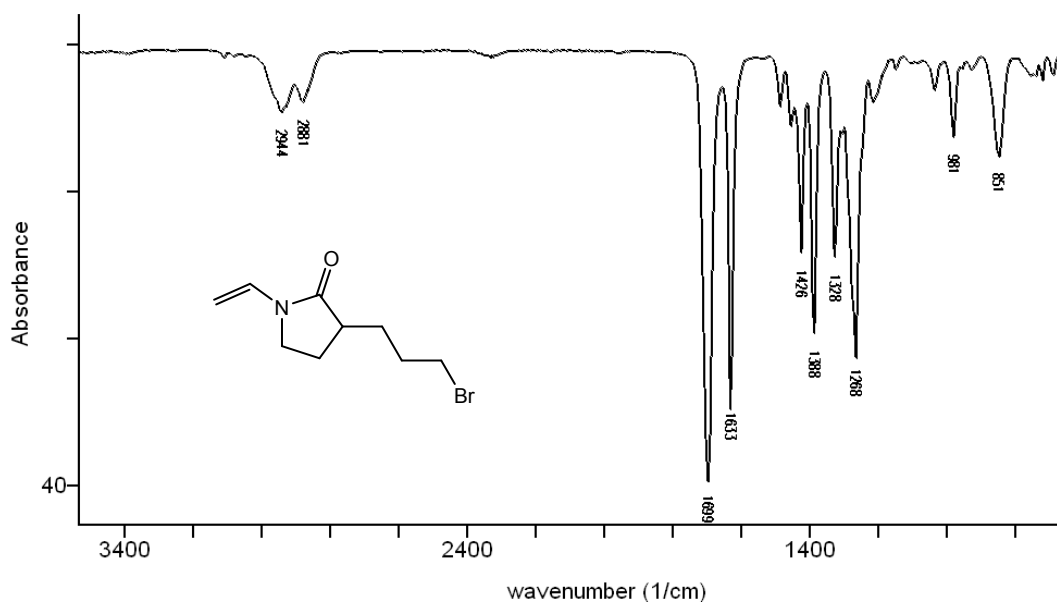

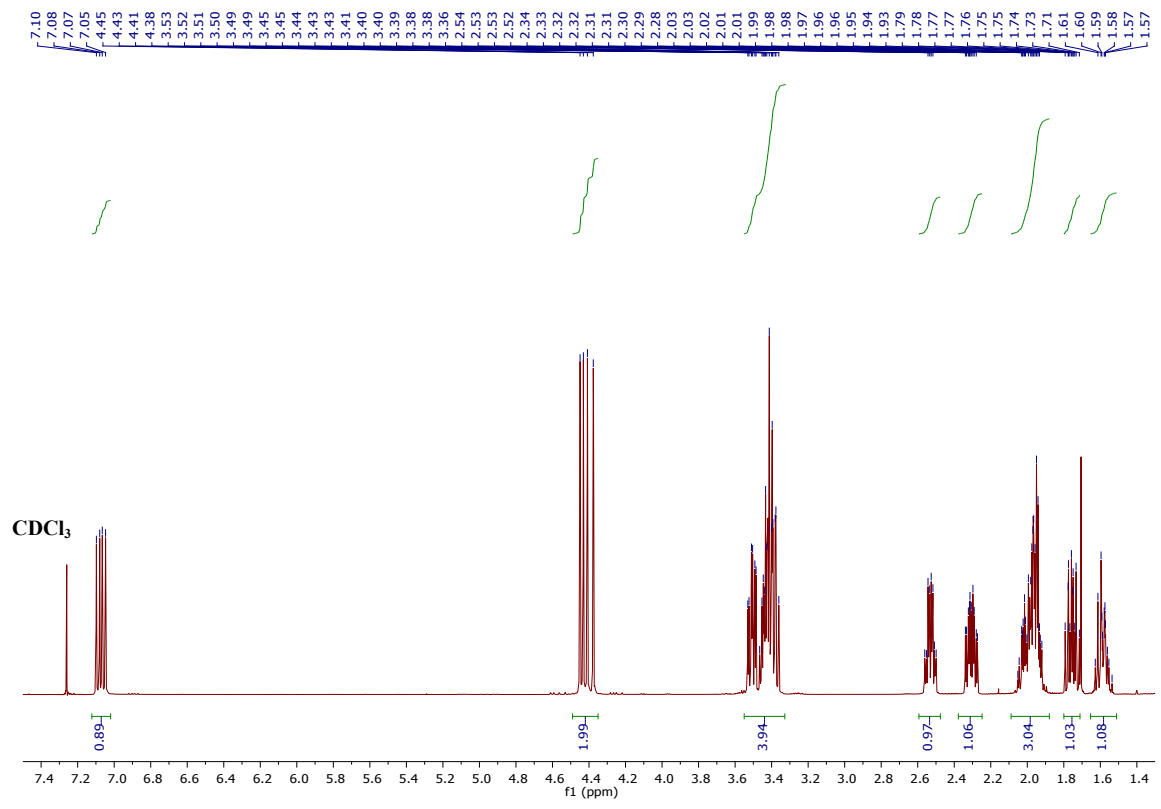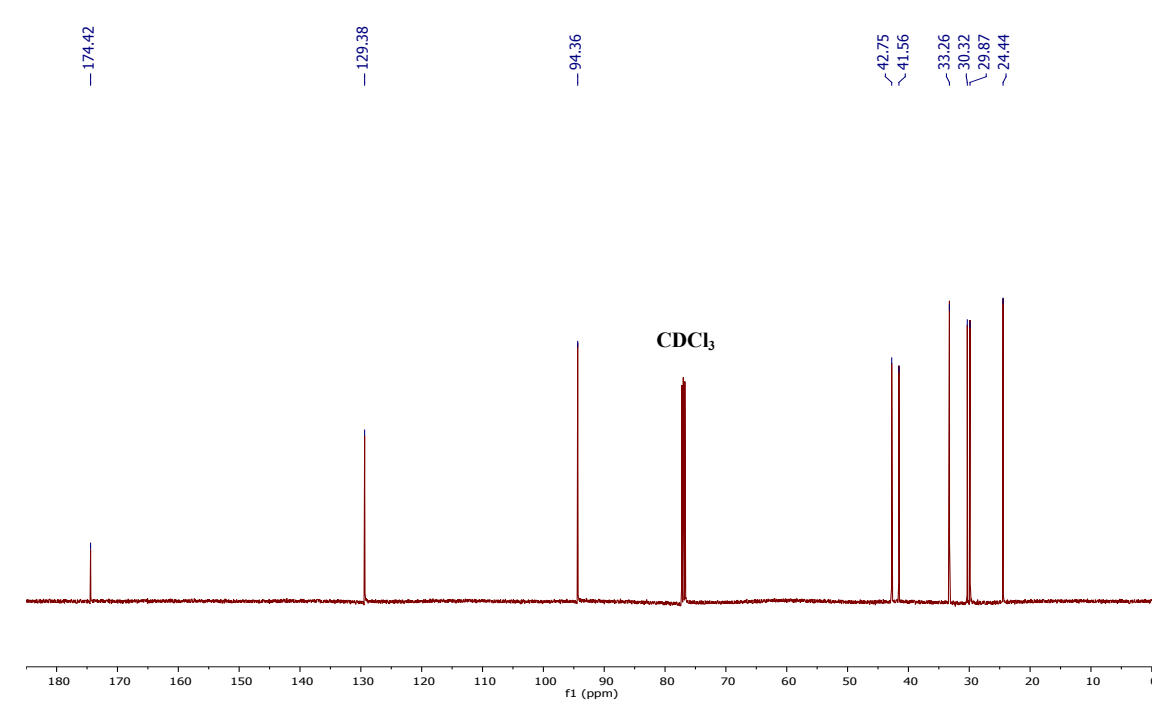

### 3-(3-phthalimidopropyl)-1-vinyl-2-pyrrolidone (VPPhta).

$^1\text{H}$  NMR ( $\text{CDCl}_3$ , 500 MHz):  $\delta$ = 7.83 (dd, 2H, C-H,  $J$ = 5.5 and 3.0 Hz), 7.70 (dd, 2H, C-H,  $J$ = 5.5 and 3.0 Hz), 7.07 (dd, 1H, N-CH=,  $J$ = 16.0 and 9.0 Hz), 4.42 (d, 1H, cis N-CH=CHH,  $J$ = 9.0 Hz), 4.38 (d, 1H, trans N-CH=CHH,  $J$ = 16.0 Hz), 3.72 (t, 2H,  $\text{CH}_2\text{-N}(\text{CO})_2$ ,  $J$ = 10.0 Hz), 3.49 (td, 1H, N-CHH,  $J$ = 10.0 and 3.0 Hz), 3.37 (dt, 1H, N-CHH,  $J$ = 10.0 and 8.0 Hz), 2.55 (qd, 1H, CH-CO,  $J$ = 9.0 and 5.0 Hz), 2.33-2.27 (m, 1H, CO-CH-CHH), 1.96-1.89 (m, 1H, CHH-CH- $\text{CH}_2$ ), 1.82-1.69 (m, 3H,  $\text{CH}_2\text{-CH}_2\text{-CH}_2$  and CO-CH-CHH), 1.47-1.39 (m, 1H, CHH- $\text{CH}_2\text{-CH}_2$ ).

$^{13}\text{C}$  NMR ( $\text{CDCl}_3$ , 125 MHz):  $\delta$ = 174.50, 168.33, 133.90, 132.03, 129.42, 123.19, 94.24, 42.75, 41.83, 37.62, 28.31, 26.20, 24.39.

FTIR ( $\text{cm}^{-1}$ ): 2943, 2883, 1771, 1698, 1630, 1425, 1394, 1328, 1266, 1051, 982, 851, 718.

MS (ESI): calculated  $m/z$  299.139 ( $\text{M}+1$ ) $^+$ , found  $m/z$  299.139.

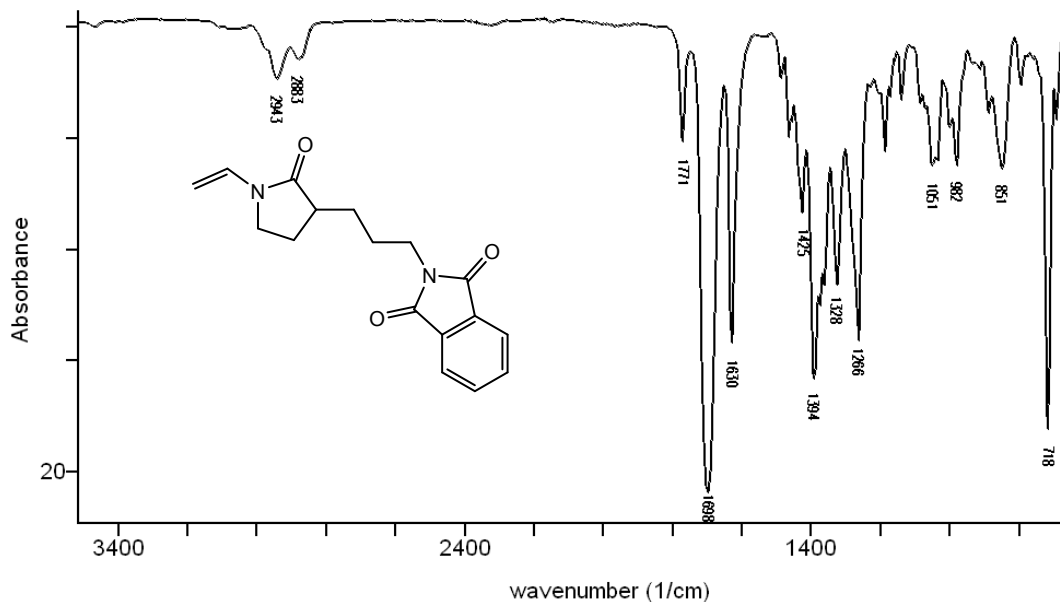

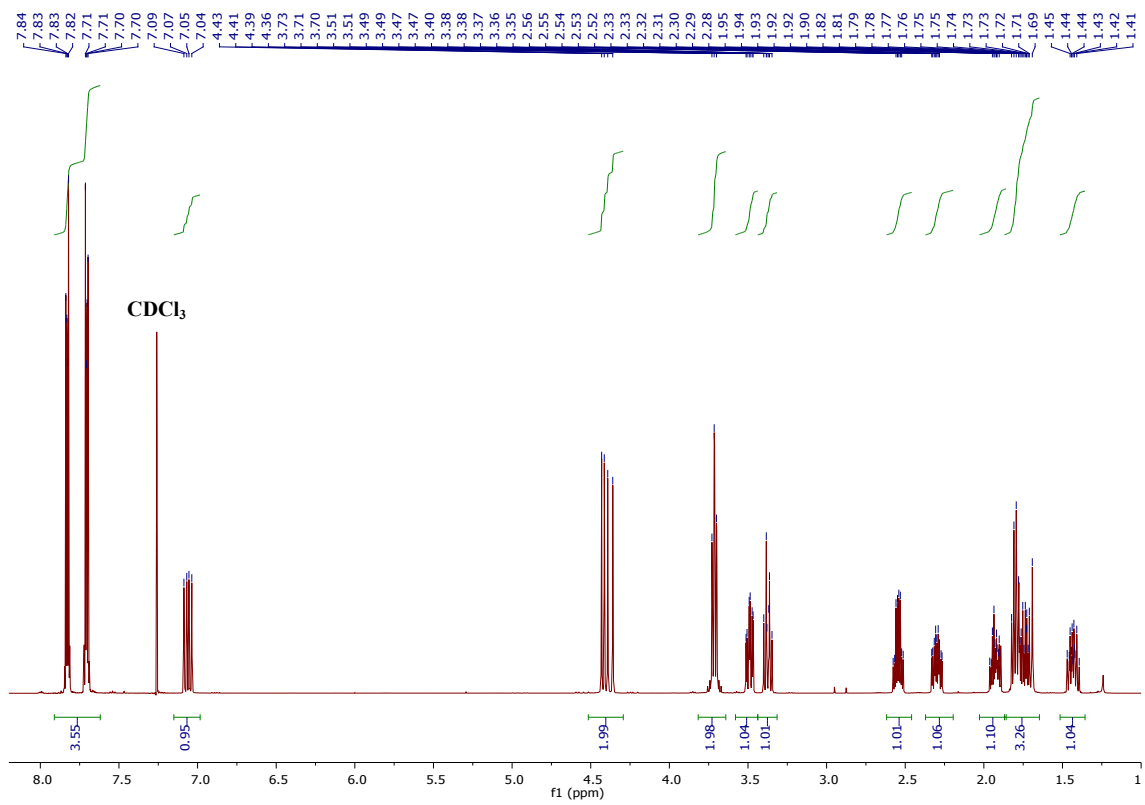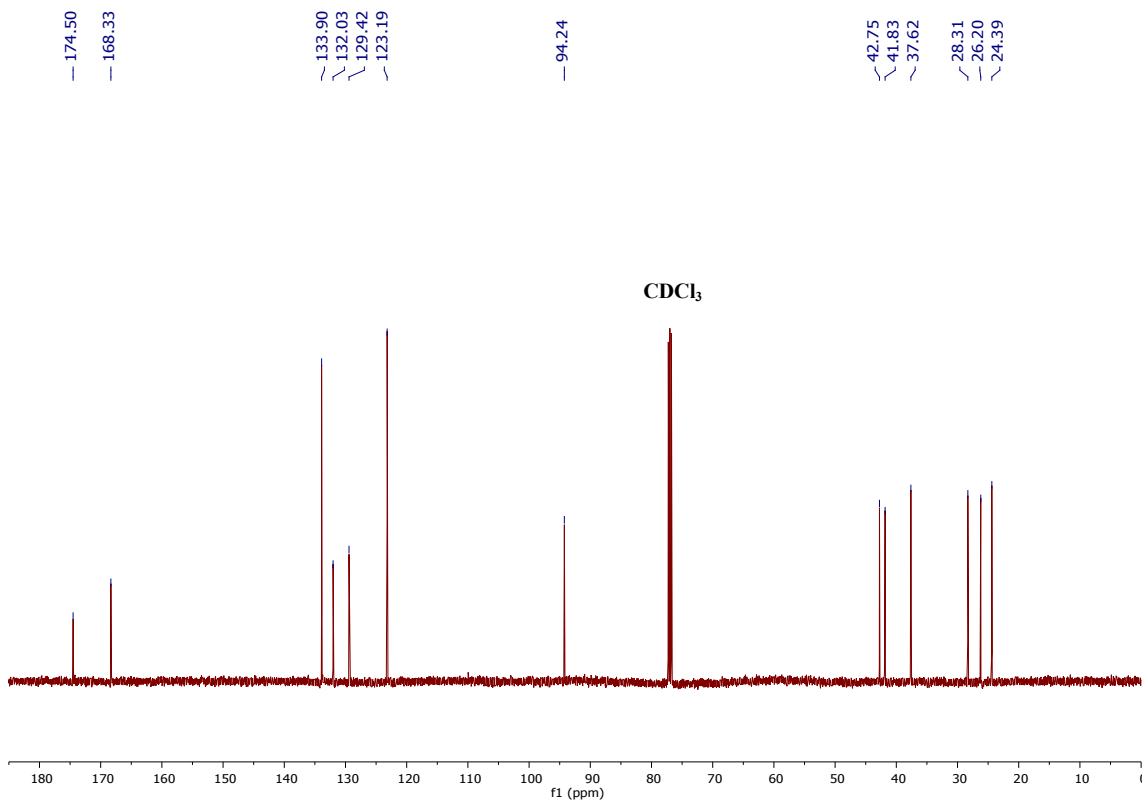

### 3-(3-aminopropyl)-1-vinyl-2-pyrrolidone (VPNH<sub>2</sub>).

<sup>1</sup>H NMR (DMSO-d<sub>6</sub>, 500 MHz): δ= 6.88 (dd, 1H, C-H, 15.0 and 9.0 Hz), 4.45 (d, 1H, trans N-CH=CHH, J= 15.0 Hz), 4.42 (d, 1H, cis N-CH=CHH, J= 9.0 Hz), 3.43 (dt, 1H, N-CHH, J= 12.0 and 3.0 Hz), 3.30 (td, 1H, N-CHH, J= 12.0 and 6.0 Hz), 2.54-2.44 (m, 3H, CH<sub>2</sub>-NH<sub>2</sub> and CH-CO), 2.26-2.19 (m, 1H, CO-CH-CHH), 1.71-1.62 (m, 2H, CO-CH-CHH and CHH-CH<sub>2</sub>-CH<sub>2</sub>), 1.42-1.24 (m, 3H, CH<sub>2</sub>-CH<sub>2</sub>-CH<sub>2</sub>, CHH-CH<sub>2</sub>-CH<sub>2</sub>).

<sup>13</sup>C NMR (DMSO-d<sub>6</sub>, 125 MHz): δ= 175.73, 129.51, 95.53, 43.21, 42.11, 41.72, 30.50, 28.47, 24.29.

FTIR (cm<sup>-1</sup>): 3341, 2932, 2857, 1684, 1630, 1563, 1470, 1427, 1388, 1326, 1265, 981, 844, 821, 723, 691.

MS (ESI): calculated m/z 169.133 (M+1)<sup>+</sup>, found m/z 169.134.

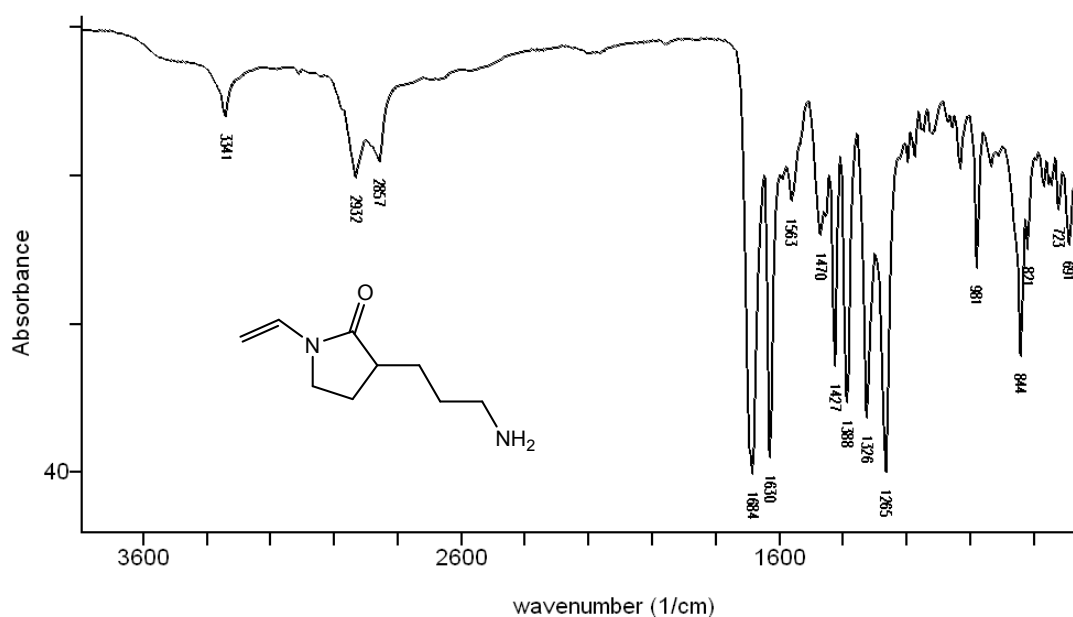

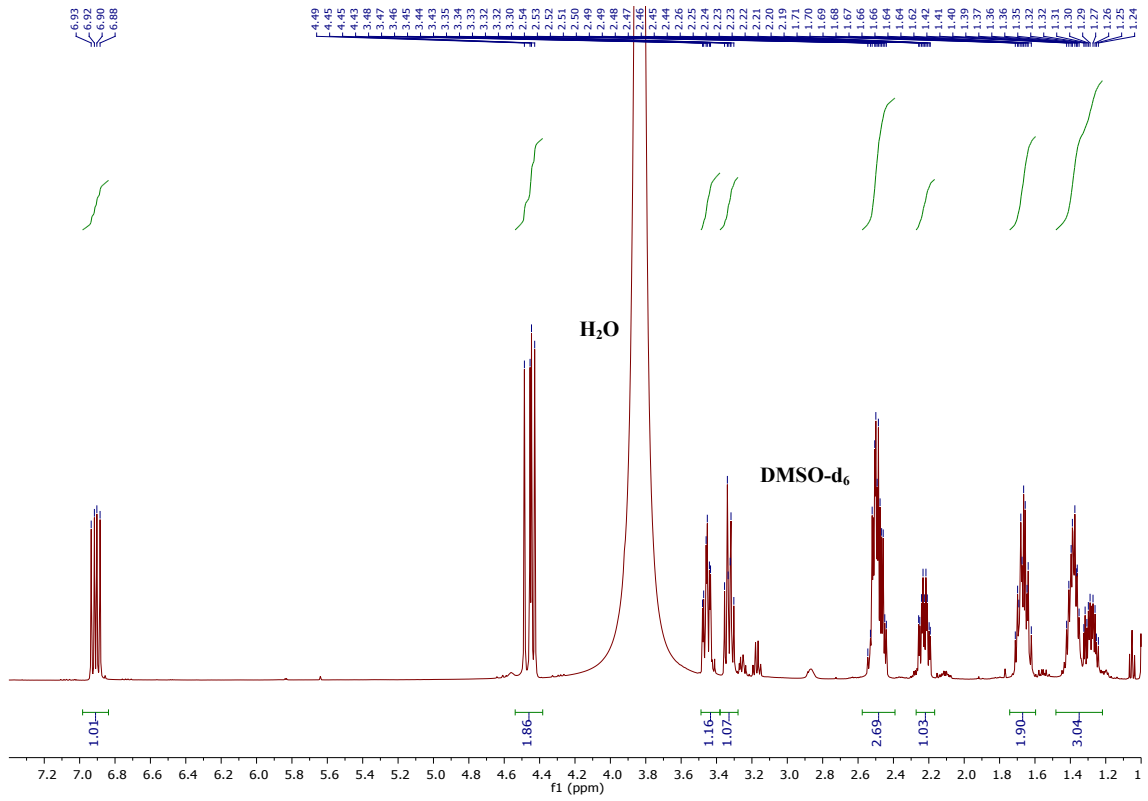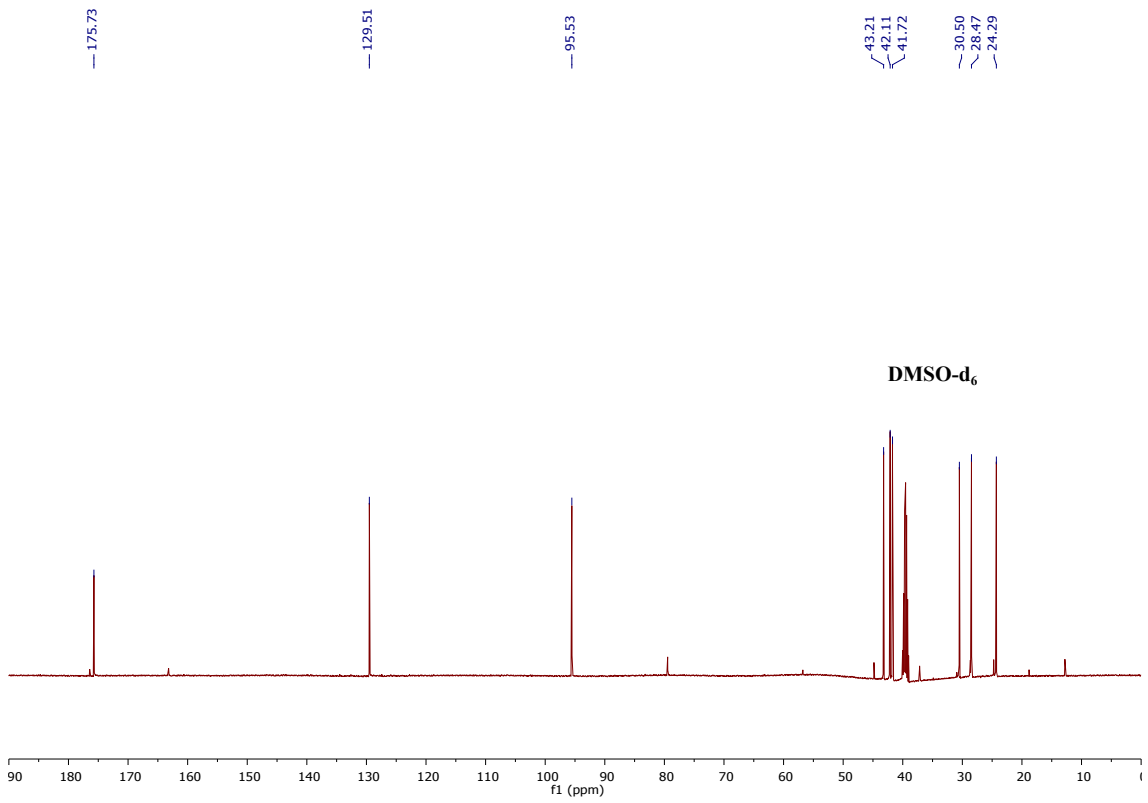

**3-(3-((3-oxo-3-(2-phenoxyethoxy)propyl)amino)propyl)-1-vinyl-2-pyrrolidone (VP-2PE).**

$^1\text{H}$  NMR ( $\text{CDCl}_3$ , 500 MHz):  $\delta$ = 7.28 (t, 2H, C-H,  $J$ = 7.5), 7.08 (dd, 1H, N-CH=CH<sub>2</sub>,  $J$ = 16.0 and 9.0 Hz), 6.96 (t, 1H, C-H,  $J$ = 7.5), 6.92-8.9 (m, 2H, C-H) 4.45-4.36 (m, 4H, N-CH=CH<sub>2</sub> and COO-CH<sub>2</sub>), 4.18-4.16 (m, 2H, COO-CH<sub>2</sub>CH<sub>2</sub>-O), 3.48 (td, 1H, N-CHH,  $J$ = 10.0 and 3.5 Hz), 3.36 (dt, 1H, N-CHH,  $J$ = 10.0 and 8.0 Hz), 2.89 (t, 2H, NH-CH<sub>2</sub>-CH<sub>2</sub>-COO,  $J$ = 6.5 Hz), 2.65-2.60 (m, 2H, CH<sub>2</sub>CH<sub>2</sub>CH<sub>2</sub>-NH), 2.58 (t, 2H, CH<sub>2</sub>-COO,  $J$ =6.5 Hz), 2.49 (qd, 1H, CH-CO,  $J$ = 9.0 and 4.5 Hz), 2.29-2.23 (m, 1H, N-CH<sub>2</sub>-CHH), 1.91-1.67 (m, 3H, N-CH<sub>2</sub>-CHH, -NH- and CO-CH-CHH), 1.54 (quint, 2H,  $J$ = 7.5 Hz), 1.44-1.36 (m, 1H, CO-CH-CHH).

$^{13}\text{C}$  NMR ( $\text{CDCl}_3$ , 125 MHz):  $\delta$ = 174.90, 172.65, 158.39, 129.48, 121.15, 114.56, 94.14, 65.75, 62.79, 42.45, 44.92, 42.80, 42.20, 34.57, 28.79, 27.56, 24.32.

FTIR ( $\text{cm}^{-1}$ ): 2929, 2881, 2825, 1733, 1697, 1630, 1599, 1589, 1494, 1426, 1387, 1327, 1245, 1168, 1120, 1060, 982, 849, 754, 692.

MS (ESI): calculated  $m/z$  361.212 ( $\text{M}+1$ )<sup>+</sup>, found  $m/z$  361.212.

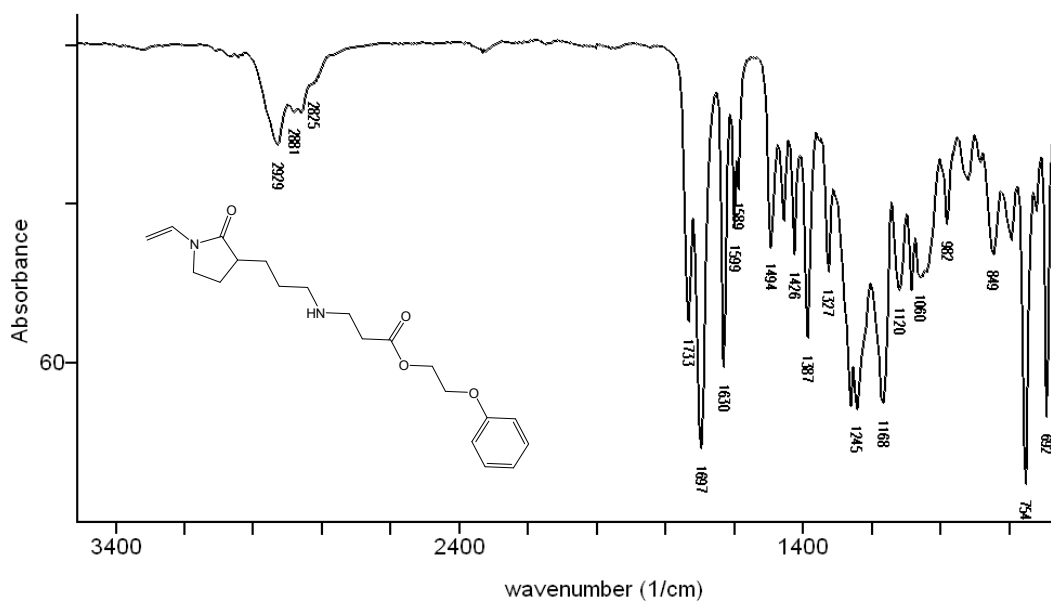



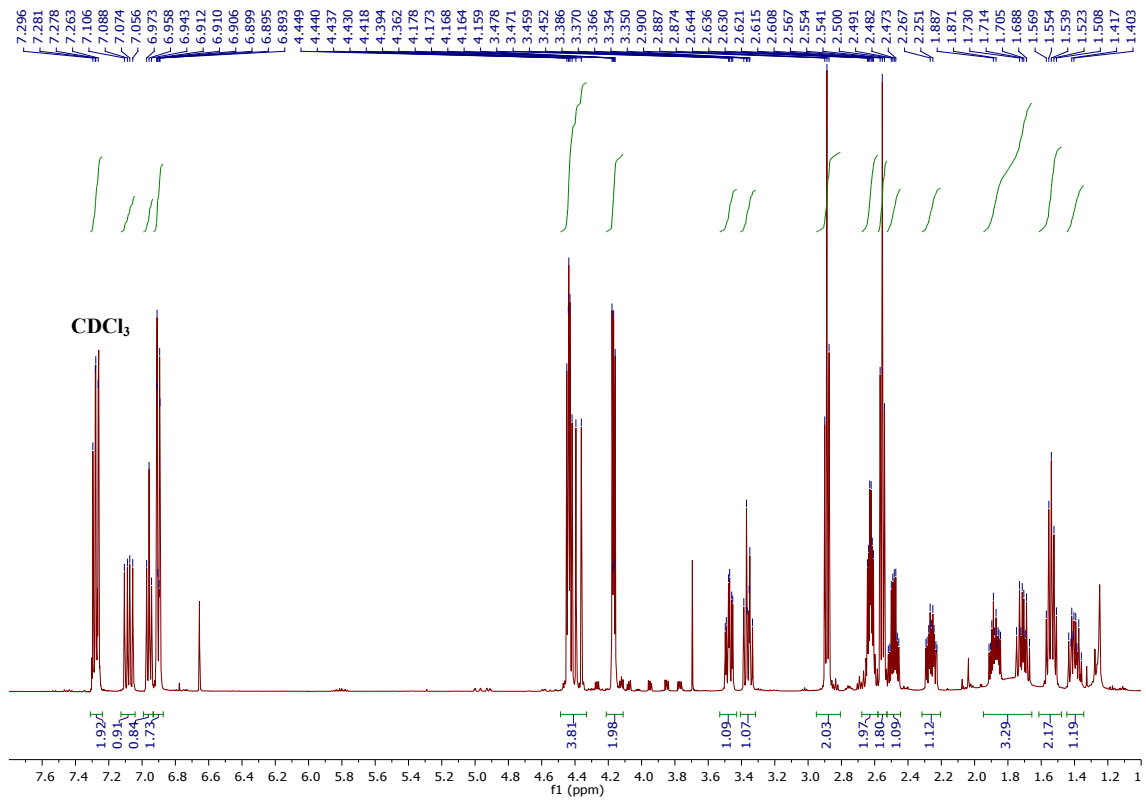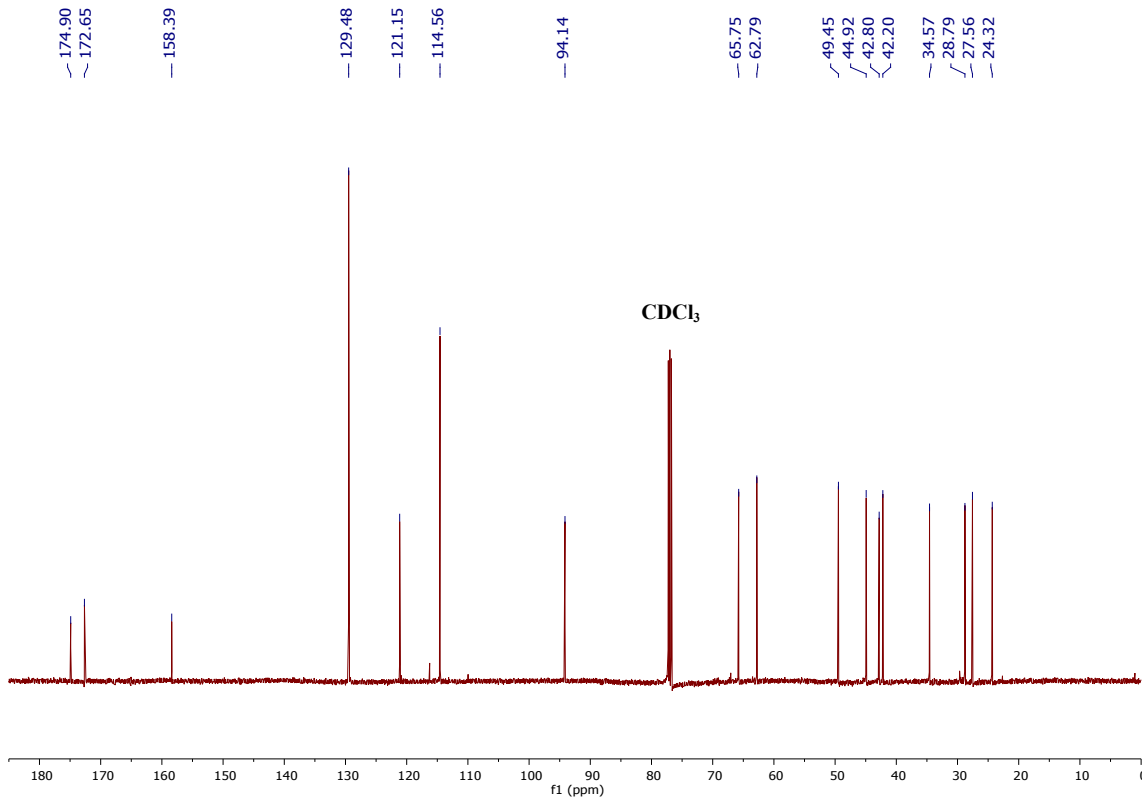

## Data concerning the determination of the reactivity ratios

| $F_{VPPhta}$ | $f_{VPPhta}$ |
|--------------|--------------|
| 0.20         | 0.17         |
| 0.40         | 0.35         |
| 0.60         | 0.51         |
| 0.80         | 0.68         |

**Table 1:** Compositional results of copolymerization of VP and VPPhta at low conversion (less than 5% weight).

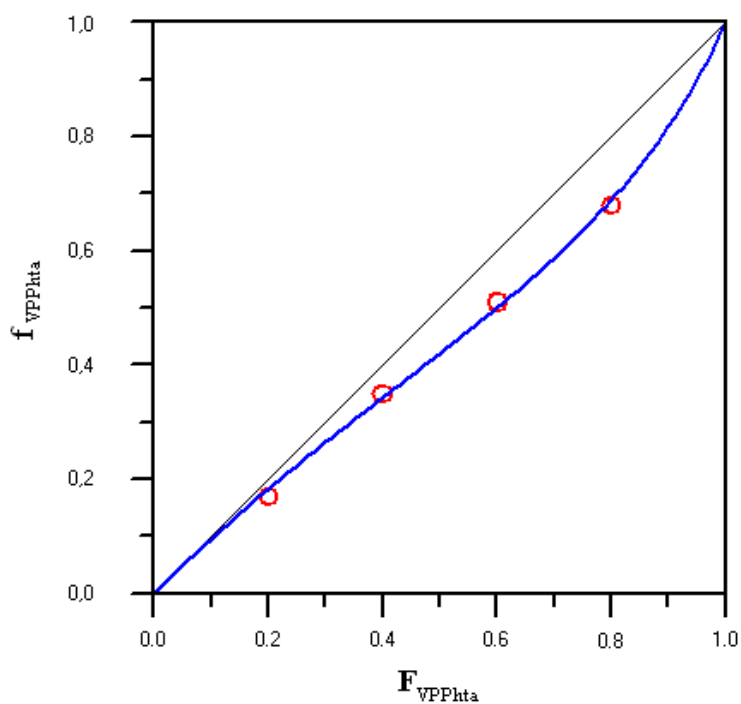

**Fig. 1:** Adjustment of the compositional results of Table S1 to the compositional equation by using the reactivity ratios  $r_{VPPhta}=0.44$  and  $r_{VP}=0.98$ , which have been obtained by the non-linear least squares treatment proposed by Tidwell and Mortimer (reference 31 of the manuscript).

## Thermogravimetric curves of poly (VP-co-VP-2PE) and PVP polymers

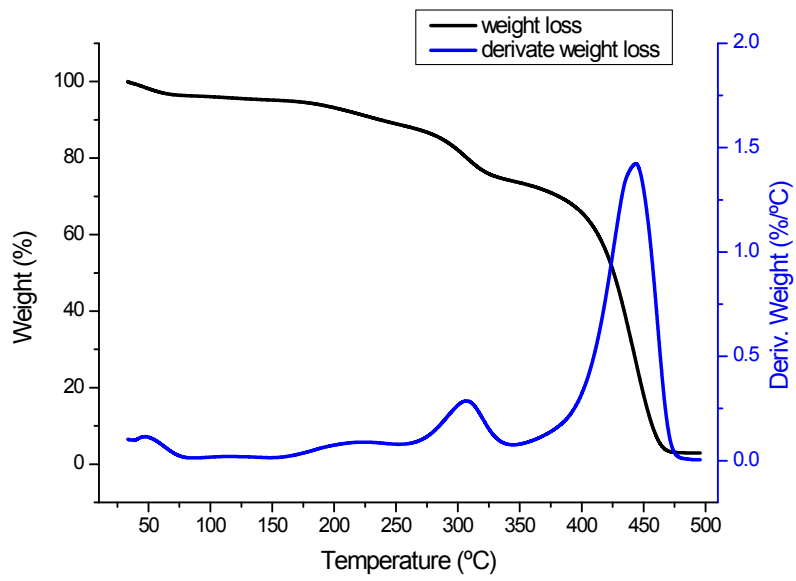

Fig. 2: TG curve of poly (VP-co-VP-2PE) copolymer.

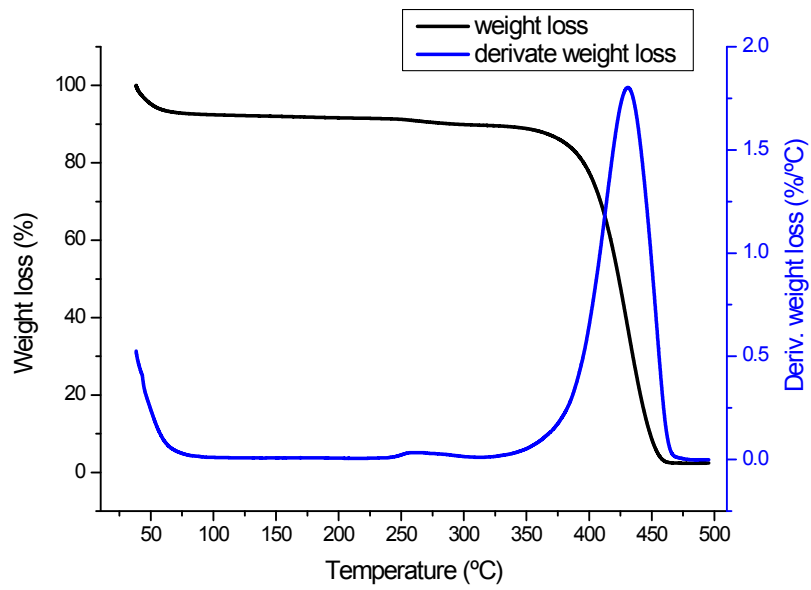

Fig. 3: TG curve of control PVP.
